# Supplementary material for: Bioactive films produced from self-assembling peptide amphiphiles as versatile substrates for tuning cell adhesion and tissue architecture in serum-free conditions
Source: Royal Society of Chemistry journal article supplement (doi:10.1039/c3tb21031f), 2013-01-01
Supplement: c3tb21031f.pdf [file c3tb21031f.pdf]

## Supplementary Figures

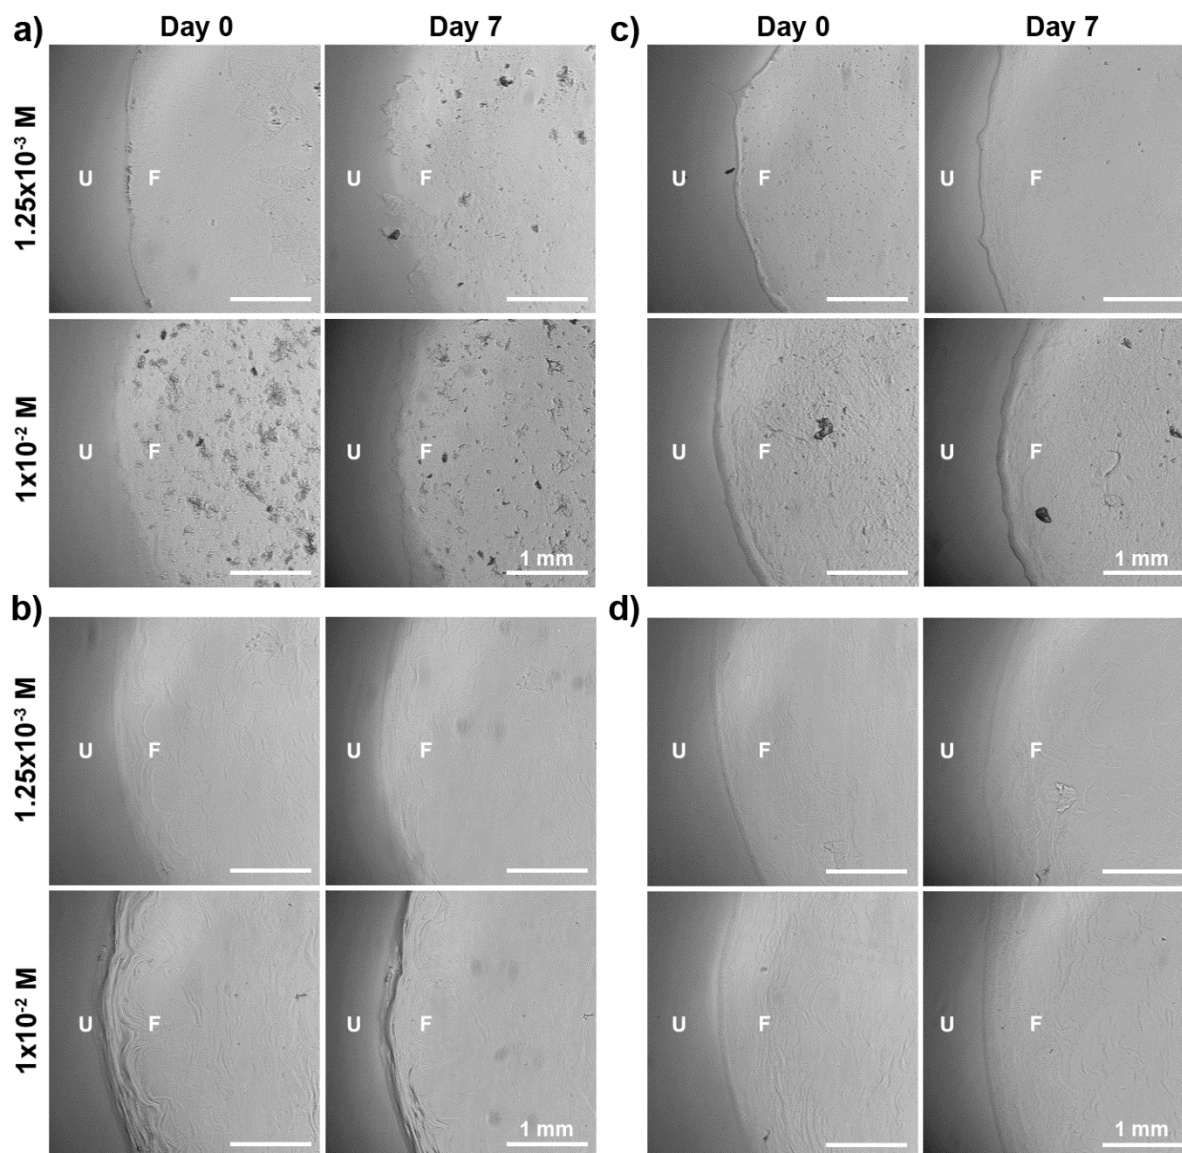

**Supplementary Figure 1:** Stability of film coatings produced from various PA concentrations. Films produced from a) RGD, b) RGDS, c) RGD:ETTES, and d) RGDS:ETTES (13:87 molar ratio) at  $1.25 \times 10^{-3}$  and  $1 \times 10^{-2}$  M were imaged upon drying (day 0) and after seven days of incubation with serum-free cell culture medium (day 7). PA coatings were maintained during the seven days incubation period, with well-defined boundaries between films (*F*) and uncoated surfaces (*U*). Scale bars = 1 mm

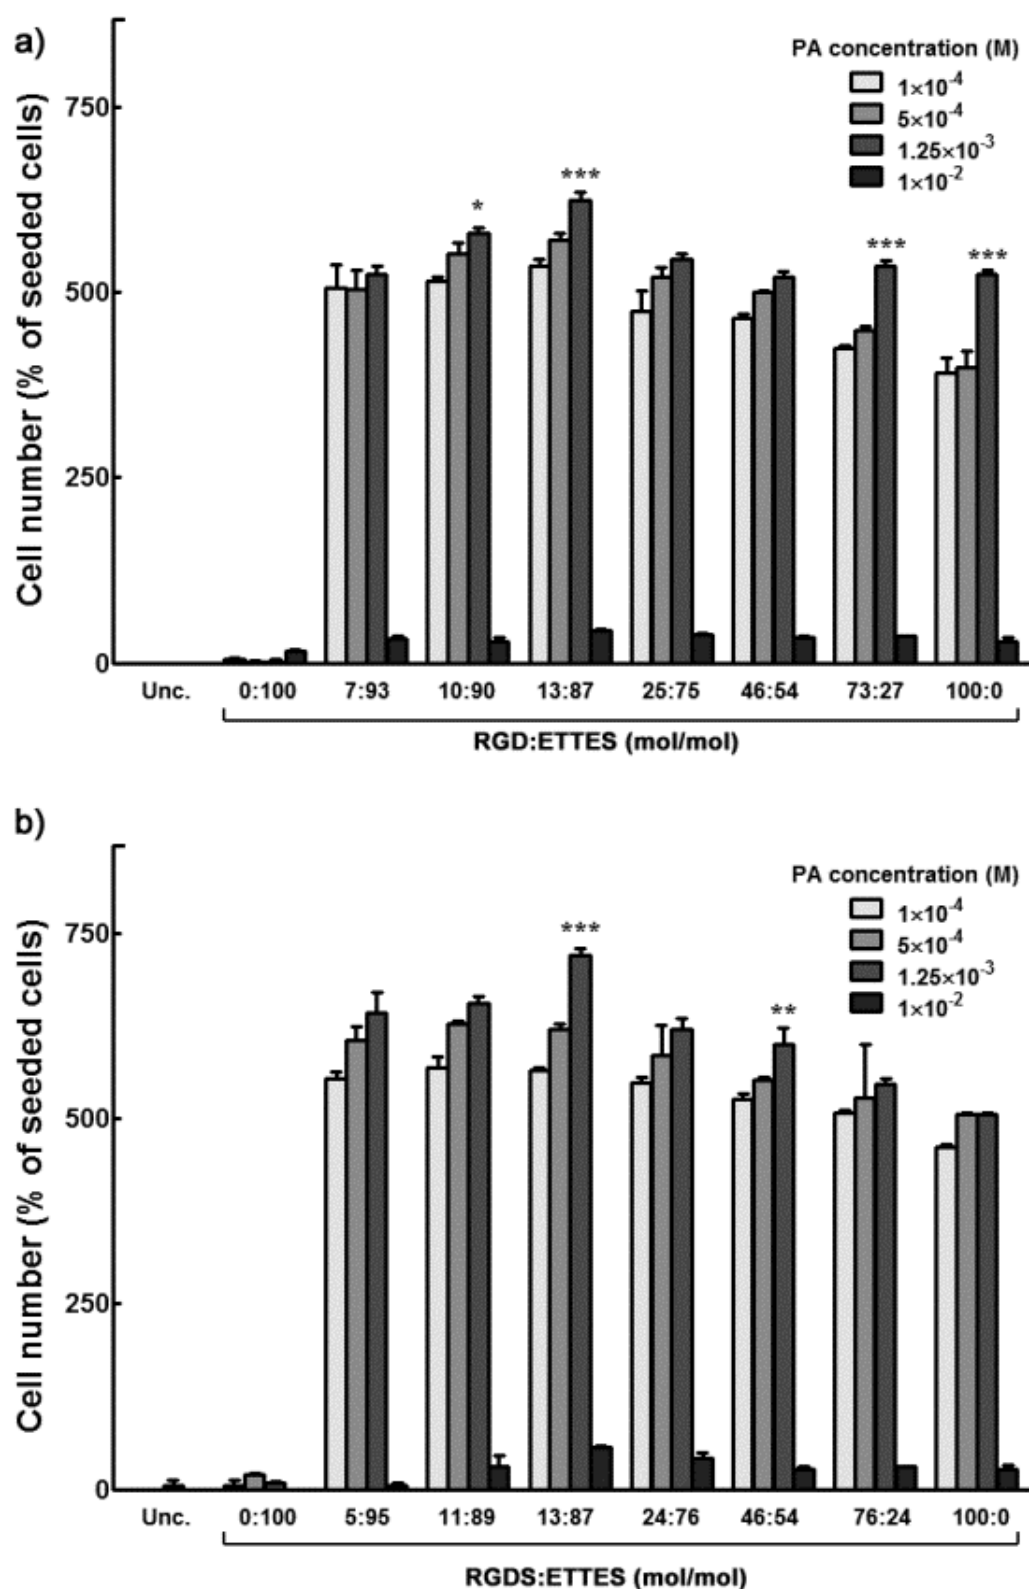

**Supplementary Figure 2:** Optimal PA concentration and ratio. Proliferation of hCSFs grown for five days on binary PA films at  $1 \times 10^{-4}$  -  $1 \times 10^{-2}$  M produced from different molar ratios of a) RGD:ETTES and b) RGDS:ETTES. Cell numbers (Mean  $\pm$  S.D.,  $n = 3$  for all experiments) obtained on optimal PA concentration of  $1.25 \times 10^{-4}$  were compared to other concentrations of corresponding PA ratio (\*, \*\* and \*\*\* corresponded to  $p < 0.05$ ,  $0.01$ , and  $0.001$ , respectively).

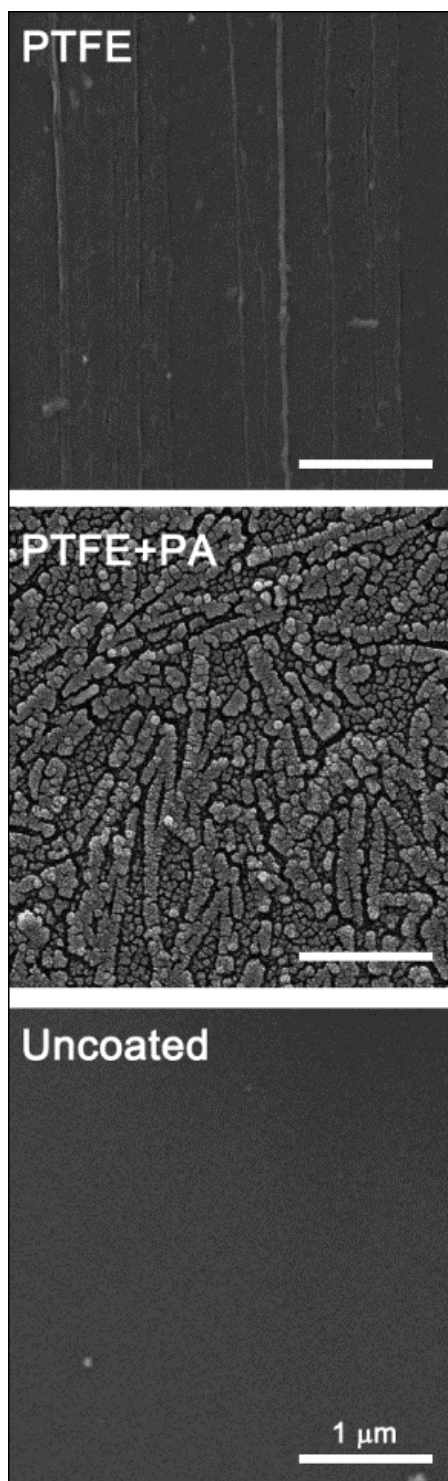

**Supplementary Figure 3:** SEM micrographs of PTFE- and PTFE+PA-coated, and uncoated glass surfaces prior to hCSF seeding. Scale bars = 1  $\mu\text{m}$ .

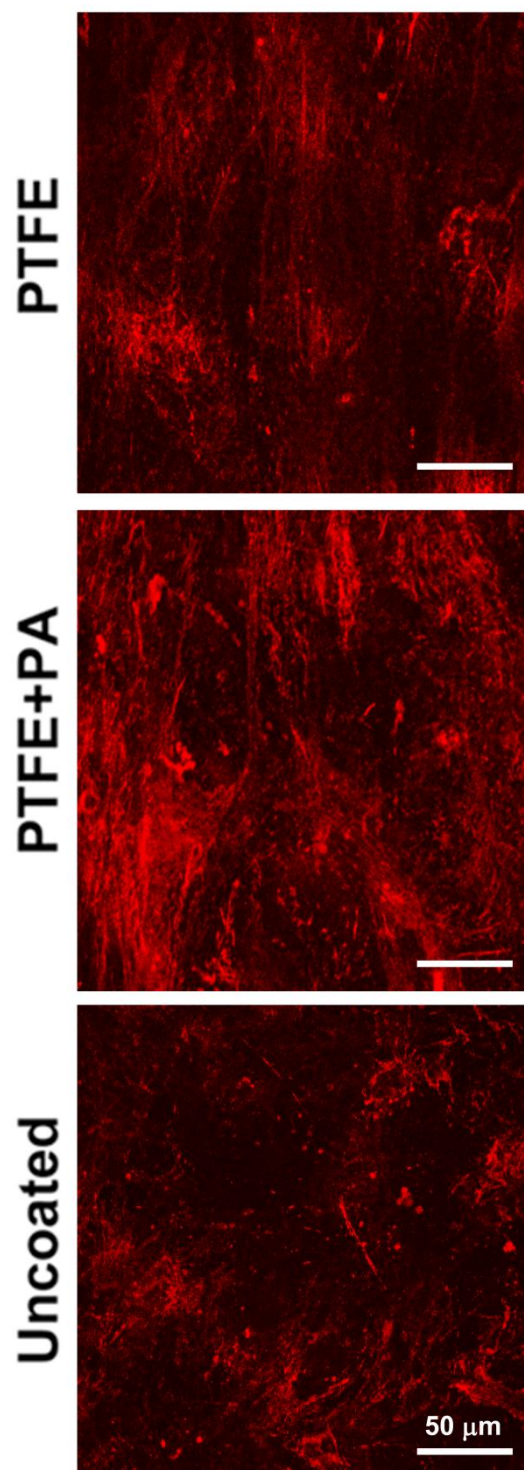

**Supplementary Figure 4:** Representative immunofluorescence micrographs of collagen fibrils deposited by hCSFs on PTFE, PTFE+PA, and uncoated glass. Tissues formed after 21 days of culture were stained with rabbit anti-collagen type I antibody followed by Alexa-594-conjugated goat anti-rabbit secondary antibody, and imaged by confocal fluorescence microscopy. Scale bars = 50  $\mu\text{m}$ .
